# Supplementary material for: Spontaneous Refractive Error, Ocular Biometry and Age Related Lens Changes in a Population of Geriatric Rhesus Macaques
Source: Research Square preprint supplement (doi:10.21203/rs.3.rs-5010162/v1), 2025-04-28
Supplement: Supplementary file 1 [file a71558d8d276f2ffddc34640.docx]

**Supplementary Figure S1**

**
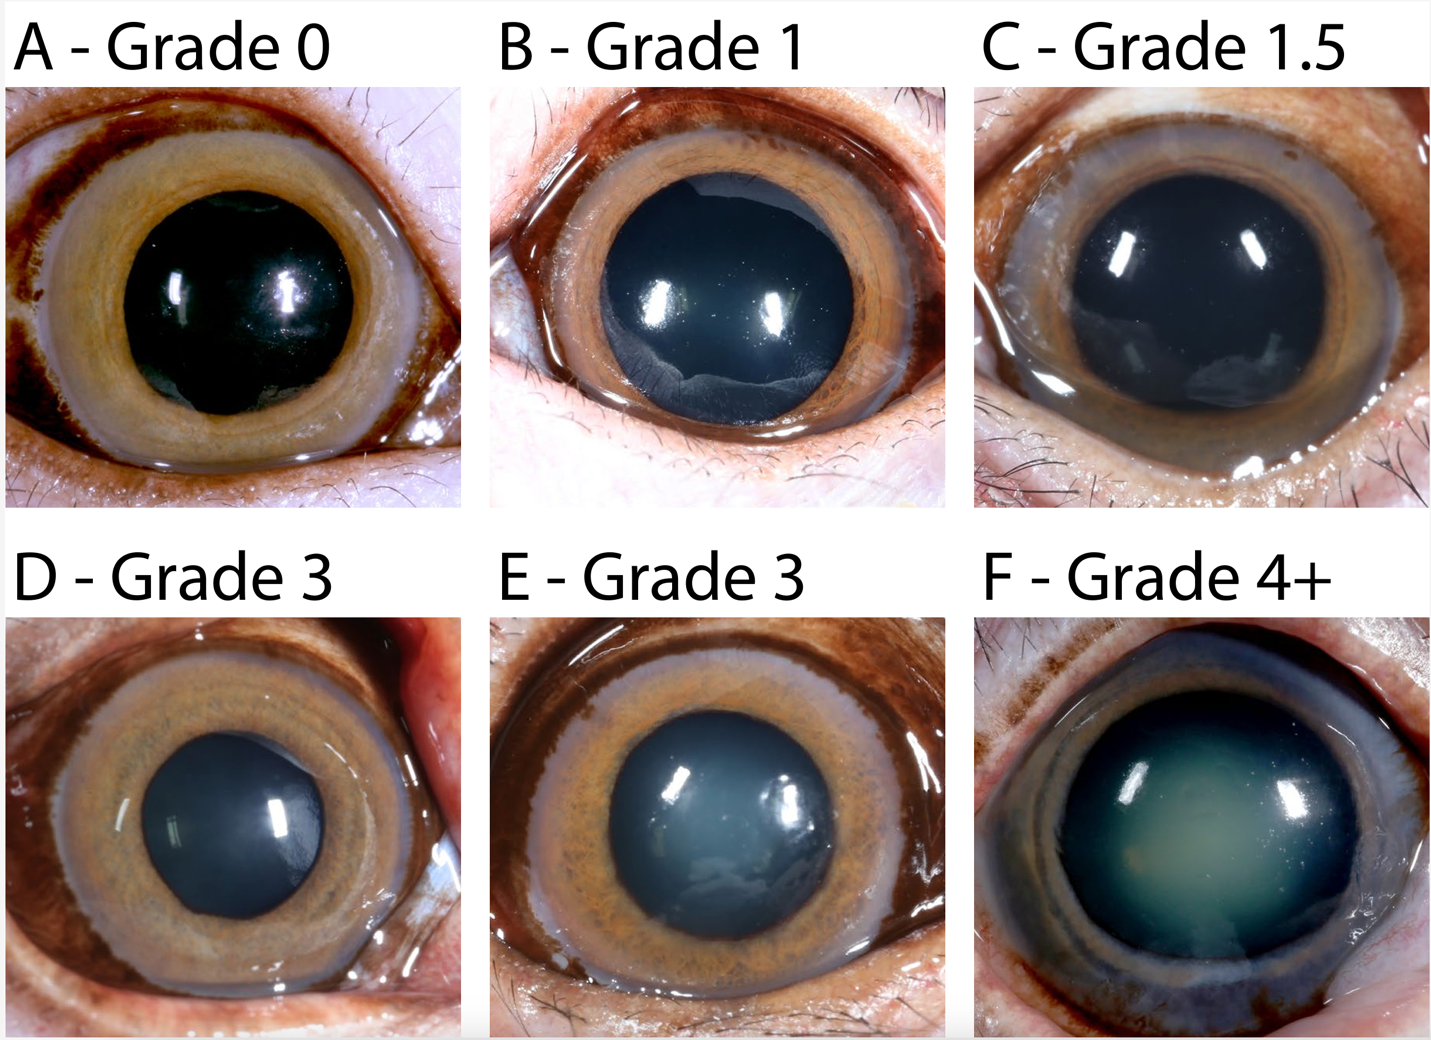
**

**Supplementary Figure S1. Evaluation of nuclear sclerosis with slit lamp biomicroscopy enables the identification of 4 different clinical grades in geriatric rhesus macaques. A,** Grade 0, normal lens with no opacity detectable. **B,** Grade 1 - Minimal opacity; the nucleus is clear with no noticeable cloudiness. **C**, Grade of 1.5 represents a mild level of lens nucleus cloudiness that falls between Grade 1 (clear/minimal opacity) and Grade 2 (mild opacity). **D,** Grade 2 - Mild opalescence; the nucleus is slightly cloudy but not significantly impairing vision. **E,** Grade 3 - Moderate opalescence; cloudiness is visible and may affect visual acuity. **F,** Grade 4 - Severe opalescence; the nucleus is highly opaque, significantly impairing vision.

**Supplementary Figure S2**

**
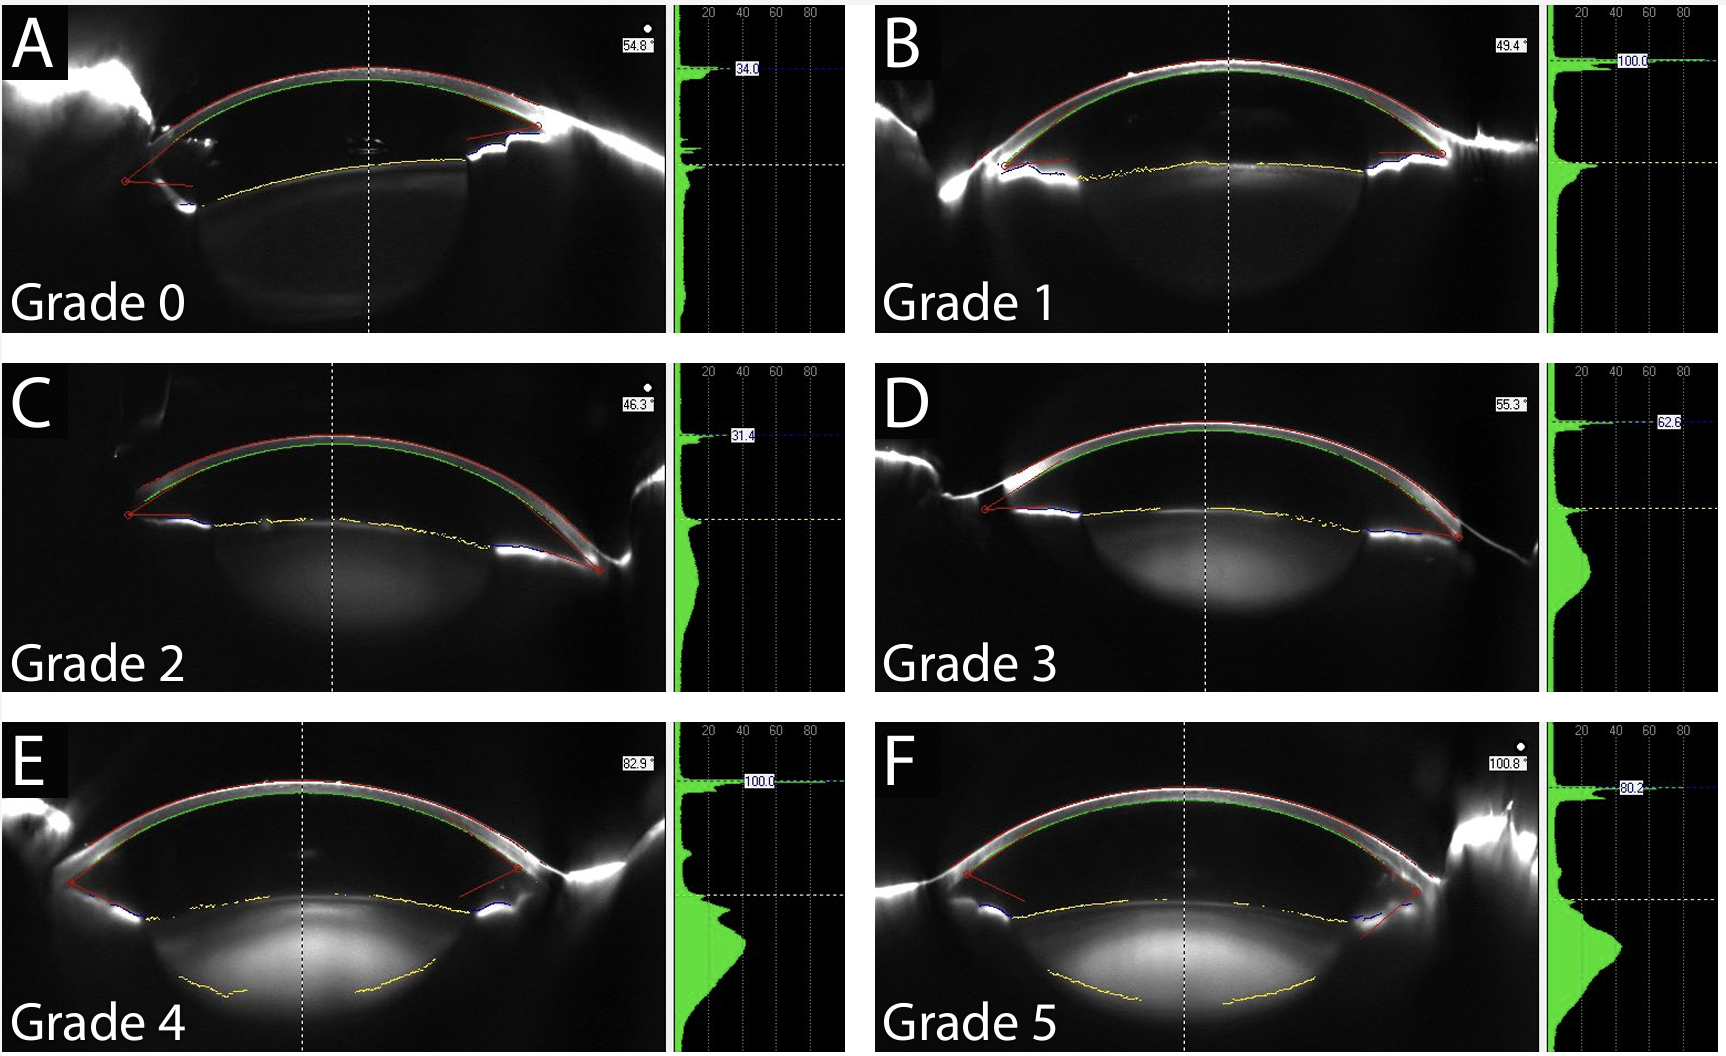
Supplementary Figure S2. Evaluation of nuclear sclerosis with Pentacam enables the identification of 5 different clinical grades in geriatric rhesus macaques. A**, Grade 0 - Clear nucleus with no visible sclerosis. **B**, Grade 1 - Very mild sclerosis with minimal lens opacity. **C**, Grade 2 - Mild sclerosis with slight increase in light scatter but still good transparency. **D**, Grade 3 - Moderate sclerosis; noticeable opacity with significant impact on transparency and light scatter. **E**, Grade 4 - Severe nuclear sclerosis; pronounced opacity with high density. **F**, Grade 5 - Extremely dense nucleus, often appearing as an advanced "brunescent" cataract.

**Supplementary Figure S3**


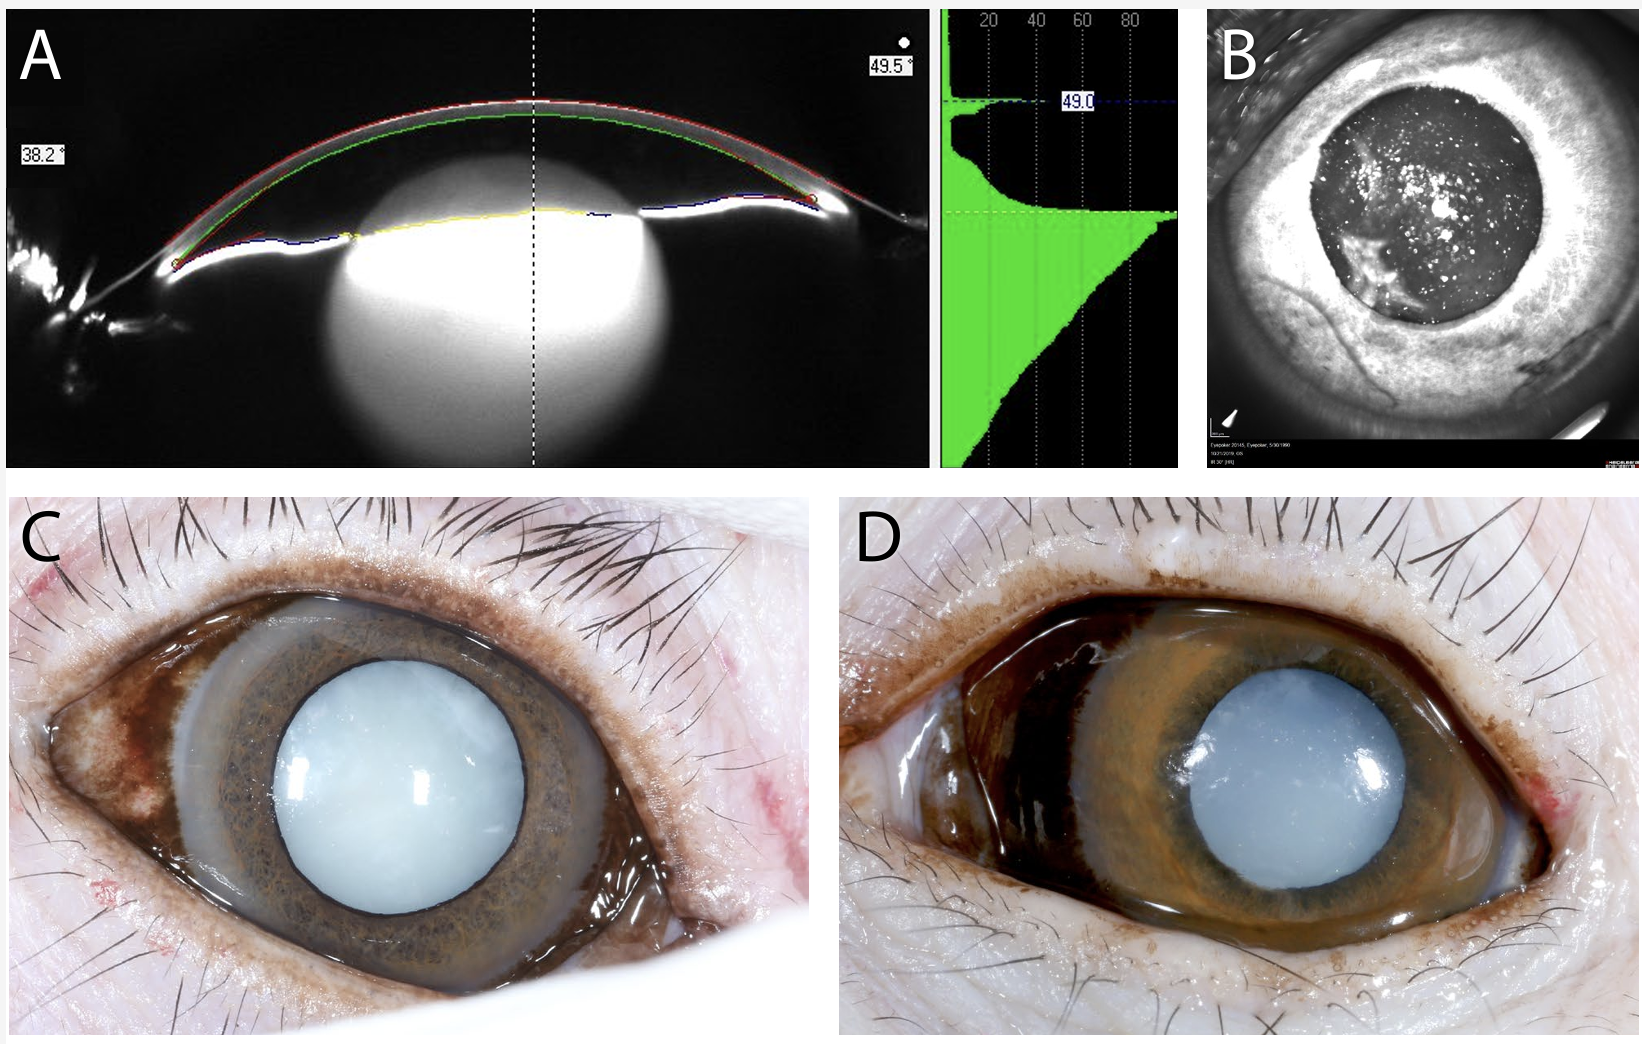


**Supplementary Figure S3. Multimodal evaluation of advanced cataract in a representative rhesus macaque illustrating the inability to perform streak retinoscopy due to media opacity. A,** Pentacam anterior segment image. **B,** Infrared confocal scanning laser ophthalmoscopy (cSLO) image showing lack of retinal reflex through the pupil. **C-D,** Two examples of representative animals in which the advanced cataract completely blocks the retinal reflex.
